# Supplementary material
Source: publisher site journal article supplement (https://www.dovepress.com/get_supplementary_file.php?f=489663.docx)
Supplement: Supplementary file 1 [file get_supplementary_file.php]

Supplementary Table 1. The baseline characteristics of the training and validation groups

| Variable | | Training (%) | | Validation (%) | | *P* | |
| --- | --- | --- | --- | --- | --- | --- | --- |
| Number |  | | 159 (100%) | | 47 (30%) | |  | |
| Age, years | <40 | | 30 (18.9%) | | 12 (25.5%) | | 0.609 | |
| 40–65 | | 85 (53.5%) | | 23 (48.9%) | |  | |
| >65 | | 44 (27.7%) | | 12 (25.5%) | |  | |
| Sex | Male | | 85 (53.5%) | | 25 (53.2%) | | 0.974 | |
| Female | | 74 (46.5%) | | 22 (46.8%) | |  | |
| Marital status | Married | | 130 (81.8%) | | 34 (72.3%) | | 0.159 | |
| Other | | 29 (18.2%) | | 13 (27.7%) | |  | |
| Occupation | Farmer | | 150 (94.4%) | | 41 (87.2%) | | 0.238 | |
| Worker | | 1 (0.6%) | | 0 (0.00%) | |  | |
| Student | | 4 (2.5%) | | 4 (8.5%) | |  | |
| Other | | 4 (2.5%) | | 2 (4.3%) | |  | |
| Education | Primary school or below | | 141 (88.7%) | | 39 (83.0%) | | 0.732 | |
| Junior school | | 6 (3.8%) | | 2 (4.3%) | |  | |
| High school | | 10 (6.3%) | | 5 (10.6%) | |  | |
| College | | 2 (1.3%) | | 1 (2.10%) | |  | |
| Body mass index (kg/m2) | | 22.47±3.46 | | 22.34±3.58 | | 0.823 | |
| Albumin (g/L) | | 39.60±5.04 | | 39.22±3.38 | | 0.684 | |
| White blood cell count (109/L) | | 13.31±56.87 | | 7.00±2.10 | | 0.454 | |
| Neutrophil count (%) | | 61.91±10.18 | | 60.05±11.43 | | 0.292 | |
| Lymphocyte count (109/L) | | 1.84±0.58 | | 1.88±0.57 | | 0.706 | |
| Duration (months) | | 1.94±1.31 | | 1.76±1.20 | | 0.378 | |
| Erythrocyte sedimentation rate (mm/H) | <20 | | 24 (20.2%) | | 7 (24.1%) | | 0.638 | |
| ≥20 | | 95 (79.8%) | | 22 (75.9%) | |  | |
| Family income (yuan) | >10000 | | 27 (17.0%) | | 12 (25.5%) | | 0.189 | |
| ≤10000 | | 132 (83.0%) | | 35 (74.5%) | |  | |


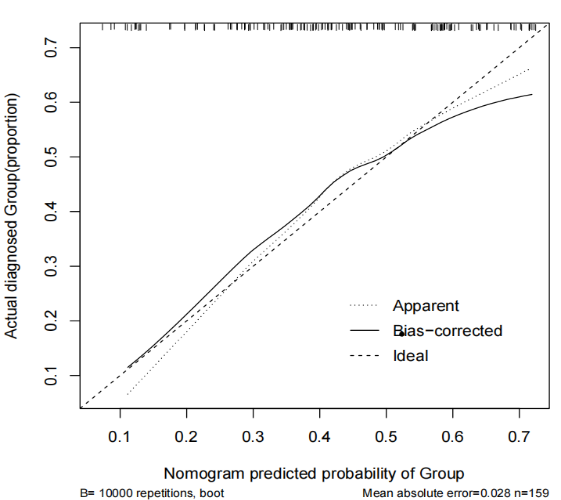


Supplementary Figure 1. Column line chart model calibration curve. The calibration curve for both the training and testing sets showed strong consistency, with no significant differences (*P*>0.05) between the predicted and actual values, indicating good predictive accuracy.


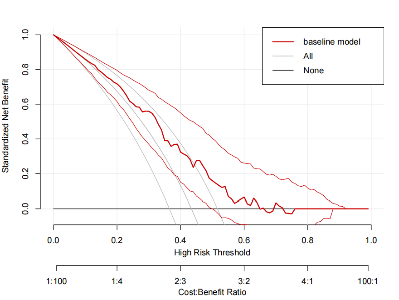


Supplementary Figure 2. Clinical decision curve. Decision curve analysis demonstrating the model’s clinical utility, with decision curves above the extremes (intervening none or all) in probability threshold ranges of 0–1 and 0.45–0.9, suggesting a higher clinical applicability and a broader effective prothrombin range.


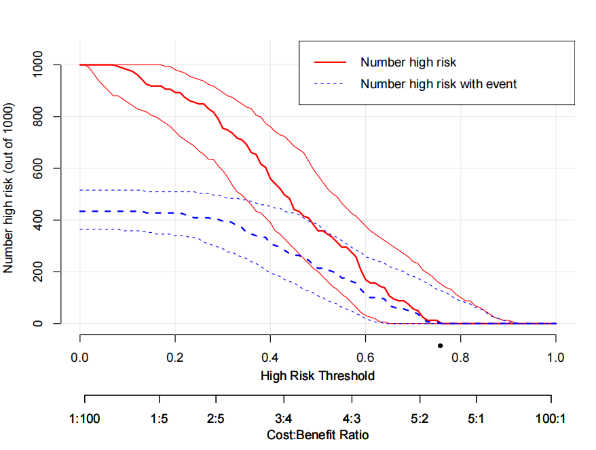


Supplementary Figure 3. Clinical impact curve. The clinical impact curve confirming the model’s effectiveness, showing a high concordance between the predicted high-risk patients and the actual cases of persistent airflow obstruction at risk thresholds above 0.36, demonstrating a high clinical prediction efficiency.
